# Supplementary material
Source: publisher figshare collection journal article supplement (https://diabetesjournals.figshare.com/ndownloader/files/31181008)
Supplement: Supplementary file 1 [file 31181008]

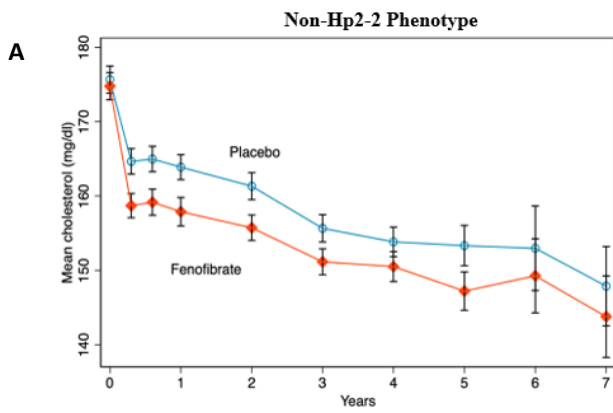

|                 |      |      |      |      |      |     |     |     |  |
|-----------------|------|------|------|------|------|-----|-----|-----|--|
| No. of Patients |      |      |      |      |      |     |     |     |  |
| Fenofibrate     | 1590 | 1512 | 1473 | 1413 | 1057 | 591 | 177 | 144 |  |
| Placebo         | 1600 | 1534 | 1493 | 1418 | 1069 | 592 | 172 | 145 |  |

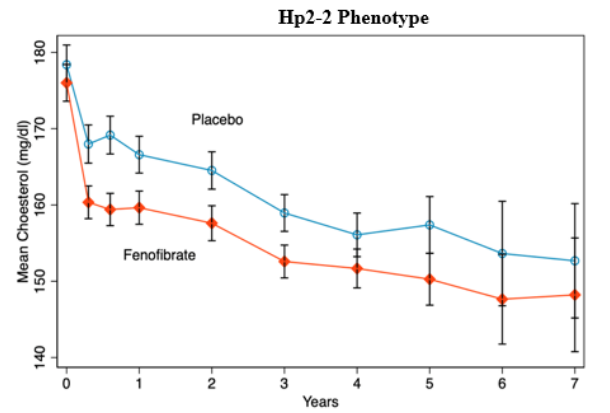

|                 |     |     |     |     |     |     |     |    |  |
|-----------------|-----|-----|-----|-----|-----|-----|-----|----|--|
| No. of Patients |     |     |     |     |     |     |     |    |  |
| Fenofibrate     | 912 | 878 | 850 | 830 | 630 | 359 | 105 | 86 |  |
| Placebo         | 869 | 839 | 807 | 782 | 608 | 355 | 97  | 80 |  |

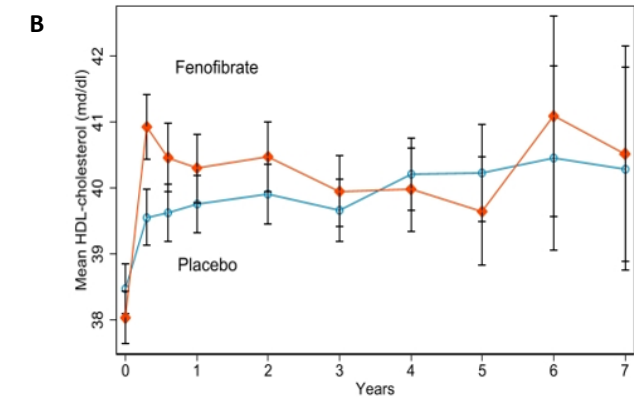

|                 |      |      |      |      |      |     |     |     |  |
|-----------------|------|------|------|------|------|-----|-----|-----|--|
| No. of Patients |      |      |      |      |      |     |     |     |  |
| Fenofibrate     | 1590 | 1512 | 1473 | 1413 | 1057 | 590 | 177 | 144 |  |
| Placebo         | 1601 | 1534 | 1493 | 1418 | 1069 | 592 | 172 | 145 |  |

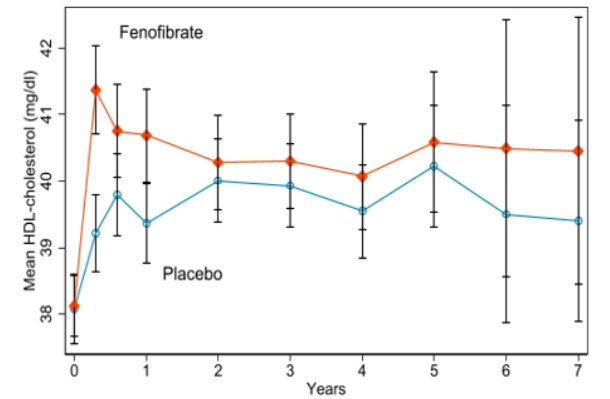

|                 |     |     |     |     |     |     |     |    |  |
|-----------------|-----|-----|-----|-----|-----|-----|-----|----|--|
| No. of Patients |     |     |     |     |     |     |     |    |  |
| Fenofibrate     | 912 | 878 | 850 | 830 | 630 | 359 | 105 | 86 |  |
| Placebo         | 869 | 839 | 807 | 782 | 608 | 355 | 97  | 80 |  |

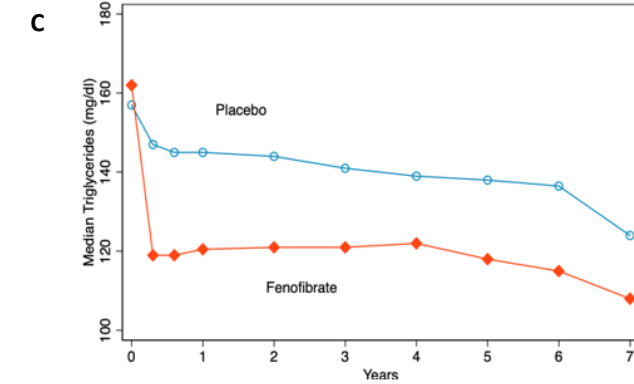

|                 |      |      |      |      |      |     |     |     |  |
|-----------------|------|------|------|------|------|-----|-----|-----|--|
| No. of Patients |      |      |      |      |      |     |     |     |  |
| Fenofibrate     | 1590 | 1512 | 1473 | 1413 | 1057 | 590 | 177 | 144 |  |
| Placebo         | 1601 | 1534 | 1493 | 1418 | 1069 | 592 | 172 | 145 |  |

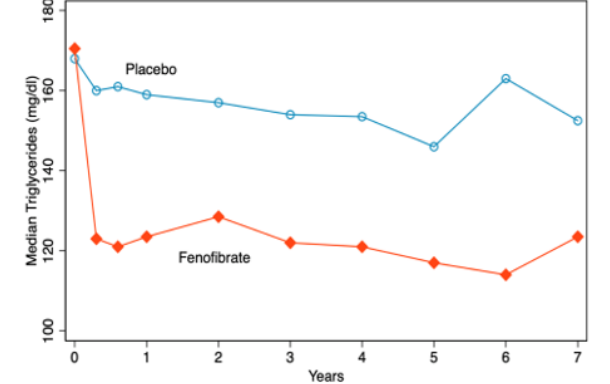

|                 |     |     |     |     |     |     |     |    |  |
|-----------------|-----|-----|-----|-----|-----|-----|-----|----|--|
| No. of Patients |     |     |     |     |     |     |     |    |  |
| Fenofibrate     | 912 | 878 | 850 | 830 | 630 | 359 | 105 | 86 |  |
| Placebo         | 869 | 839 | 807 | 782 | 608 | 355 | 97  | 80 |  |

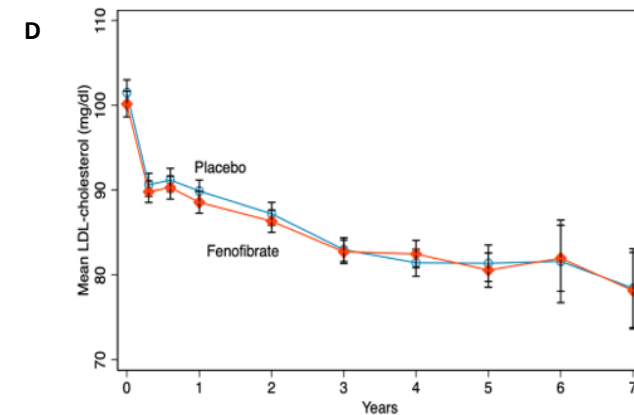

|                 |      |      |      |      |      |     |     |     |  |
|-----------------|------|------|------|------|------|-----|-----|-----|--|
| No. of Patients |      |      |      |      |      |     |     |     |  |
| Fenofibrate     | 1590 | 1512 | 1473 | 1413 | 1057 | 590 | 177 | 144 |  |
| Placebo         | 1600 | 1534 | 1493 | 1418 | 1069 | 592 | 172 | 145 |  |

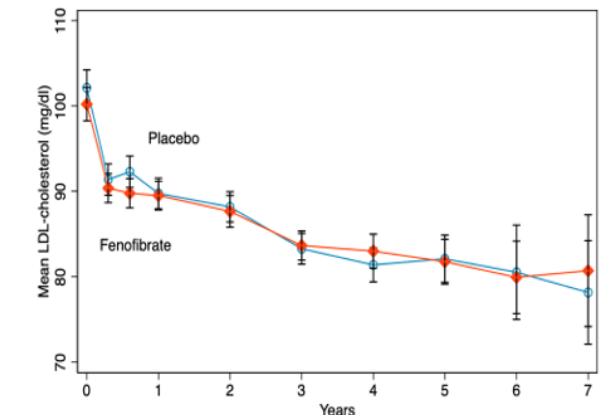

|                 |     |     |     |     |     |     |     |    |  |
|-----------------|-----|-----|-----|-----|-----|-----|-----|----|--|
| No. of Patients |     |     |     |     |     |     |     |    |  |
| Fenofibrate     | 912 | 878 | 850 | 830 | 630 | 359 | 105 | 86 |  |
| Placebo         | 869 | 839 | 807 | 782 | 608 | 355 | 97  | 80 |  |

**Supplementary Figure 1.** Unadjusted plasma levels of (A) mean total cholesterol, (B) mean HDL-cholesterol, (C) median triglycerides, and (D) mean low-density lipoprotein (LDL) cholesterol at baseline, 4 months, 8 months, 1 year, and annually thereafter for ACCORD lipid trial participants without and with the Hp2-2 phenotype separately. P-values for differences between study groups at 4 months and the end of the study among non-Hp2-2s were, respectively: total cholesterol,  $P < 0.001$  and  $P = 0.12$ ; LDL cholesterol,  $P = 0.39$  and  $P = 0.23$ ; HDL cholesterol,  $P < 0.001$  and  $P = 0.13$ ; and triglycerides,  $P < 0.001$  for both comparisons with the use of nonparametric tests. P-values for differences between study groups at 4 months and the end of the study among patients with the Hp2-2 phenotype, respectively: total cholesterol,  $P < 0.001$  and  $P = 0.03$ ; LDL cholesterol,  $P = 0.43$  and  $P = 0.76$ ; HDL cholesterol,  $P < 0.001$  and  $P = 0.25$ ; and triglycerides,  $P < 0.001$  for both comparisons with the use of nonparametric tests. End-of-study visits were those that occurred in early 2009 and included follow-up at years 4, 5, 6, and 7.
